# Supplementary material
Source: HighWire-hosted journal article supplement (https://cmaj.ca/highwire/filestream/76564/field_highwire_adjunct_files/0/200077-res-1-at.pdf)
Supplement: 200077-res-1-at.pdf [file 200077-res-1-at.pdf]

**Appendix 1 (as supplied by the authors): Flow chart of the systematic survey**

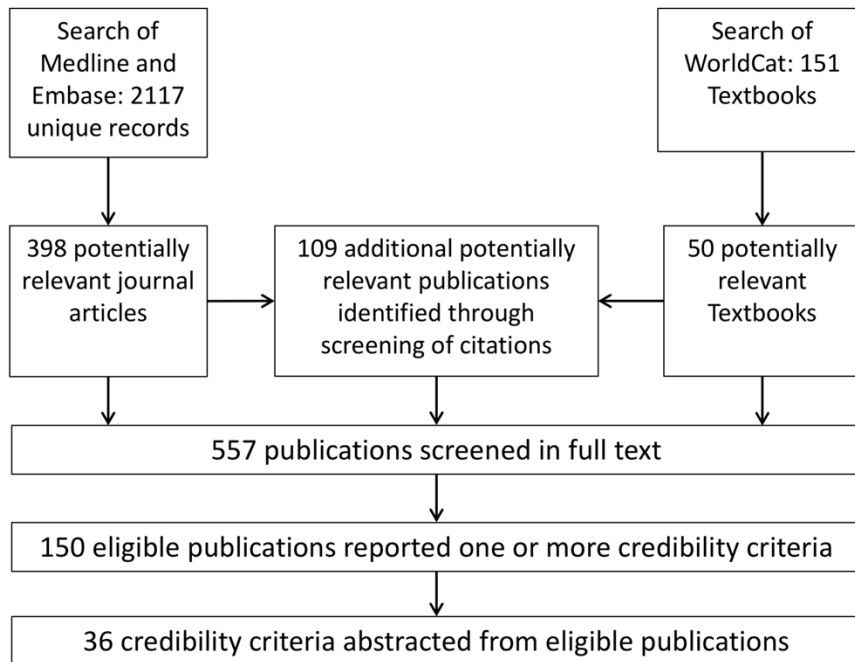

Originally published in S. Schandelmaier et al., J Clin Epidemiol 2019;113:159-167. Reprinted with permission of Elsevier (license number 4786981128139)
